# Supplementary material for: Evaluation of Heterocyclic Carboxamides as Potential Efflux Pump Inhibitors in Pseudomonas aeruginosa
Source: MDPI journal article supplement (doi:10.3390/antibiotics11010030), 2021-12-28
Supplement: s1 [file s1]

## Supplementary Materials

# Evaluation of Heterocyclic Carboxamides as Potential Efflux Pump Inhibitors in *Pseudomonas aeruginosa*

Yi Yuan, Jesus D. Rosado-Lugo, Yongzheng Zhang, Pratik Datta, Yangsheng Sun, Yanlu Cao, Anamika Banerjee and Ajit K. Parhi \*

TAXIS Pharmaceuticals, Inc., 9 Deer Park Drive, Suite J-15, Monmouth Junction, New Jersey 08852, USA

Correspondence: [aparhi@taxispharma.com](mailto:aparhi@taxispharma.com) (A.K.P.); Tel.: +1 732-230-3074

### Chemistry Supporting Information

All solvents and chemicals were used as purchased without further purification. Mass spectrometry (MS) was performed by electrospray (ESI) ionization using a Shimadzu 2020 LC-MS quadrupole mass spectrometer. <sup>1</sup>H and <sup>13</sup>C-NMR were recorded using a Varian Oxford 300, Chemical shifts are given in parts per million (ppm) (δ relative to residual solvent peak for <sup>1</sup>H and <sup>13</sup>C). The coupling constants (J) are reported in hertz (Hz).

All new compounds are prepared according to the general synthetic procedure and the spectral data is reported here:

(S)-N-(2,5-diaminopentyl)-5-(4-fluorophenyl)benzo[d]thiazole-2-carboxamide hydrogen chloride salt **6a**.

<sup>1</sup>H NMR (300 MHz, DMSO-d<sub>6</sub>) δ 9.32 (m, 1H), 8.30 (m, 1H), 8.29 (m, 1H), 8.22 (s br, 2H), 8.05 (s br, 2H), 7.88 (m, 1H), 7.83 (m, 2H), 7.35 (t, J = 9 Hz, 2H), 3.50-3.68 (m, 3H), 2.79 (m, 2H), 1.68 (m, 4H).

(S)-N-(2,5-diaminopentyl)-6-(4-fluorophenyl)benzo[d]thiazole-2-carboxamide hydrogen chloride salt **6b**.

<sup>1</sup>H NMR (300 MHz, DMSO-d<sub>6</sub>) δ 9.31 (m, 1H), 8.53 (s, 1H), 8.28 (s br, 2H), 8.16 (m, 1H), 8.13 (s br, 2H), 7.90 (m, 1H), 7.81 (m, 2H), 7.34 (t, J = 9 Hz, 2H), 3.46-3.66 (m, 3H), 2.79 (m, 2H), 1.69 (m, 4H).

MS (ESI+) m/z: calcd for C<sub>19</sub>H<sub>22</sub>FN<sub>4</sub>OS [M+H]<sup>+</sup>: 373.15; found 373.20.

(S)-N-(2,5-diaminopentyl)-6-(4-fluorophenyl)-1H-benzo[d]imidazole-2-carboxamide hydrogen chloride salt **6c** has been previously described by E. J. LaVoie et al. in patent application: WO2018,165,611.

(R)-N-(2,5-diaminopentyl)-6-(4-fluorophenyl)-1H-benzo[d]imidazole-2-carboxamide hydrogen chloride salt **6d** has been previously described by E. J. LaVoie et al. in patent application: WO2018,165,611.

(S)-N-(2,5-diaminopentyl)-5-(4-fluorophenyl)benzofuran-2-carboxamide hydrogen chloride salt **6e**

<sup>1</sup>H NMR (300 MHz, D<sub>2</sub>O) δ 8.23 (s, 1H), 7.71 (m, 3H), 7.66 (m, 2H), 7.20 (t, J = 9 Hz, 2H), 3.75 (m, 1H), 3.67 (m, 1H), 3.57 (m, 1H), 3.02 (m, 2H), 1.82 (m, 4H). MS (ESI+) m/z: calcd for C<sub>20</sub>H<sub>23</sub>FN<sub>3</sub>O<sub>2</sub> [M+H]<sup>+</sup>: 356.18; found 356.05.

(*S*)-*N*-(2,5-diaminopentyl)-6-(4-fluorophenyl)benzofuran-2-carboxamide hydrogen chloride salt **6f**

<sup>1</sup>H NMR (300 MHz, D<sub>2</sub>O) δ 7.81 (m, 2H), 7.72 (m, 2H), 7.61 (m, 1H), 7.55 (s, 1H), 7.24 (t, *J* = 9 Hz, 2H), 3.78 (m, 1H), 3.63 (m, 1H), 3.58 (m, 1H), 3.05 (m, 2H), 1.83 (m, 4H). MS (ESI+) *m/z*: calcd for C<sub>20</sub>H<sub>23</sub>FN<sub>3</sub>O<sub>2</sub> [M+H]<sup>+</sup>: 356.18; found 356.05.

(*S*)-*N*-(2,5-diaminopentyl)-5-(4-fluorophenyl)benzo[*b*]thiophene-2-carboxamide hydrogen chloride salt **6g**

<sup>1</sup>H NMR (300 MHz, D<sub>2</sub>O) δ 7.97 (s, 1H), 7.85 (m, 1H), 7.78 (s, 1H), 7.60 (m, 3H), 7.18 (m, 2H), 3.66 (m, 1H), 3.61 (m, 1H), 3.52 (m, 1H), 3.06 (m, 2H), 1.81 (m, 4H). MS (ESI+) *m/z*: calcd for C<sub>20</sub>H<sub>23</sub>FN<sub>3</sub>OS [M+H]<sup>+</sup>: 372.15; found 372.00.

(*S*)-*N*-(2,5-diaminopentyl)-5-(4-fluorophenyl)benzo[*b*]thiophene-2-carboxamide hydrogen chloride salt **6h**

<sup>1</sup>H NMR (300 MHz, D<sub>2</sub>O) δ 7.96 (s, 1H), 7.84 (m, 1H), 7.82 (s, 1H), 7.60 (m, 3H), 7.18 (m, 2H), 3.64 (m, 1H), 3.60 (m, 1H), 3.51 (m, 1H), 3.04 (m, 2H), 1.81 (m, 4H). MS (ESI+) *m/z*: calcd for C<sub>20</sub>H<sub>23</sub>FN<sub>3</sub>OS [M+H]<sup>+</sup>: 372.15; found 372.00.

(*S*)-*N*-(2,5-diaminopentyl)-5-(4-fluorophenyl)-1*H*-indole-2-carboxamide hydrogen chloride salt **6i** has been previously described by E. J. LaVoie et al. in patent application: WO2018,165,612.

(*R*)-*N*-(2,5-diaminopentyl)-5-(4-fluorophenyl)-1*H*-indole-2-carboxamide hydrogen chloride salt **6k** has been previously described by E. J. LaVoie et al. in patent application: WO2018,165,612.

(*R*)-*N*-(2,5-diaminopentyl)-6-(4-fluorophenyl)-1*H*-indole-2-carboxamide hydrogen chloride salt **6l** has been previously described by E. J. LaVoie et al. in patent application: WO2018,165,612

(*S*)-*N*-(2,5-diaminopentyl)-5-(4-fluorophenyl)-1*H*-pyrrolo[2,3-*c*]pyridine-2-carboxamide hydrogen chloride salt **6m**

<sup>1</sup>H NMR (300 MHz, CD<sub>3</sub>OD) δ 9.07 (s, 1H), 8.48 (s, 1H), 7.93 (m, 2H), 7.71 (s, 1H), 7.40 (t, *J* = 8.7 Hz, 2H), 3.83 (m, 1H), 3.68 (m, 1H), 3.52 (m, 1H), 3.04 (m, 2H), 1.89 (m, 4H). <sup>13</sup>C NMR (75 MHz, CD<sub>3</sub>OD) δ 161.02, 143.04, 140.24, 138.53, 130.96, 129.94, 129.83, 129.74, 129.19, 128.47, 117.25, 116.40, 116.09, 104.17, 51.81, 40.63, 38.85, 27.14, 23.23. MS (ESI+) *m/z*: calcd for C<sub>19</sub>H<sub>23</sub>FN<sub>5</sub>O [M+H]<sup>+</sup>: 356.19; found 356.20.

(*S*)-*N*-(2,5-diaminopentyl)-6-(4-fluorophenyl)-1*H*-pyrrolo[3,2-*c*]pyridine-2-carboxamide hydrogen chloride salt **6n**

<sup>1</sup>H NMR (300 MHz, D<sub>2</sub>O) δ 9.14 (s, 1H), 7.88 (s, 1H), 7.85 (m, 2H), 7.55 (s, 1H), 7.36 (t, *J* = 8.7 Hz, 2H), 3.82 (m, 1H), 3.69 (m, 1H), 3.59 (m, 1H), 3.04 (m, 2H), 1.82 (m, 4H). MS (ESI+) *m/z*: calcd for C<sub>19</sub>H<sub>23</sub>FN<sub>5</sub>O [M+H]<sup>+</sup>: 356.19; found 356.25.

**Table S1.** Levofloxacin potentiation in the presence of EPI on *P. aeruginosa* strains overexpressing efflux pumps.

| Compound                                    | Strain       |                         |                         |                         |                         |
|---------------------------------------------|--------------|-------------------------|-------------------------|-------------------------|-------------------------|
|                                             | K767<br>(WT) | K1455*<br>(↑mexAB-oprM) | K2415*<br>(↑mexXY-oprM) | K2951*<br>(↑mexCD-oprJ) | K2376#<br>(↑mexEF-oprN) |
| Levofloxacin MIC (μg/mL), (fold difference) |              |                         |                         |                         |                         |
| 6f                                          | 0.125, (4)   | 1, (4)                  | 0.5, (4)                | 0.125, (4)              | 4, (2)                  |
| 6g                                          | 0.063, (8)   | 0.25, (16)              | 0.25, (8)               | 0.063, (8)              | 0.5, (16)               |
| 6h                                          | 0.25, (2)    | 1, (4)                  | 0.5, (4)                | 0.125, (4)              | 4, (2)                  |
| 6i                                          | 0.25, (2)    | 1, (4)                  | 0.5, (4)                | 0.25, (2)               | 2, (4)                  |
| 6j<br>(TXA01182)                            | 0.063, (8)   | 0.5, (8)                | 0.25, (8)               | 0.125, (4)              | 2, (4)                  |
| 6l                                          | 0.125, (4)   | 0.5, (8)                | 0.25, (8)               | 0.125, (4)              | 2, (4)                  |
| -                                           | 0.5          | 4                       | 2                       | 0.5                     | 8                       |

\* Derived from K767, # clinical isolate.

**Table S2.** Ciprofloxacin and tigecycline potentiation in the presence of TXA01182 on resistant clinical isolates.

| <i>P. aeruginosa</i><br>Strain | Ciprofloxacin MIC<br>(μg/mL), (fold difference) |                            | Tigecycline MIC<br>(μg/mL), (fold difference) |                            | Resistance Mechanisms                    |
|--------------------------------|-------------------------------------------------|----------------------------|-----------------------------------------------|----------------------------|------------------------------------------|
|                                | No<br>EPI                                       | + TXA01182<br>(6.25 μg/mL) | No<br>EPI                                     | + TXA01182<br>(6.25 μg/mL) |                                          |
| AR-0229                        | 32                                              | 8, (4)                     | 128                                           | 8, (16)                    | <i>gyrA-T83I, nalC-G71E, mexR-V126Q</i>  |
| AR-0232                        | 4                                               | 1, (4)                     | 16                                            | 8, (2)                     | <i>gyrA-T83I, nalC-G71E, mexR-V126Q</i>  |
| AR-0234                        | 4                                               | 1, (4)                     | 16                                            | 8, (2)                     | <i>gyrA-T83I, nalC-G71E, mexR-V126Q</i>  |
| AR-0239                        | 32                                              | 16, (2)                    | 16                                            | 8, (2)                     | <i>gyrA-T83I, nalC-G71E, mexR-V126Q</i>  |
| AR-0244                        | 64                                              | 16, (4)                    | 64                                            | 8, (8)                     | <i>gyrA-T133H, nalC-G71E, mexR-V126Q</i> |
| AR-0246                        | 32                                              | 16, (2)                    | 64                                            | 16, (4)                    | <i>gyrA-T83I, nalC-G71E, mexR-V126Q</i>  |
| AR-0249                        | 32                                              | 8, (4)                     | 64                                            | 4, (16)                    | <i>gyrA-T83I, nalC-G71E</i>              |
| AR-0264                        | 32                                              | 8, (4)                     | 16                                            | 2, (8)                     | <i>gyrA-D87Y, nalC-G71E</i>              |

**Table S3.** Frequency of resistance to Cefepime alone and in combination with TXA01182.

| Strain                          | Cefepime alone<br>(4 μg/mL) | Cefepime (4 μg/mL) +<br>TXA01182 (12.5 μg/mL) |
|---------------------------------|-----------------------------|-----------------------------------------------|
| <i>P. aeruginosa</i> ATCC 27853 | 2.05 x 10 <sup>-6</sup>     | <1.04 x 10 <sup>-7</sup>                      |
